# Supplementary material
Source: MDPI journal article supplement (https://www.mdpi.com/1424-2818/15/7/843)
Supplement: s1 [file s1]

Archive with 14 entries (14 files):
- Bangi_Supplementary Tables_rvsd.pdf
- Bangi_Supplementary_Figures_rvsd.pdf
- FIGURE 1_Final2.tiff
- FIGURE 2_Final2.tif
- FIGURE 3_Final2.tiff
- FIGURE 4_Final2.tiff
- FIGURE 5_Final2.tiff
- FIGURE 6_Final2.tiff
- FIGURE 7_Final2.tiff
- source data_sea urchin parameters_FINAL.xlsx
- source data_seagrass parameters_FINAL.xlsx
- Table 1 and 2_editable_Final2.pdf
- Table 1_Final.tif
- Table 2_Final.tif
