# Supplementary material
Source: MDPI journal article supplement (https://www.mdpi.com/1424-2818/15/7/843)
Supplement: s1 [file s1 › Bangi_Supplementary Tables_rvsd.pdf]

**Supplemental Table 1.** Summary of results on the distance-based linear model (DistLM) examining the percentage of variance accounted for each biological variable (*T. gratilla* phenotypic traits, repletion index), and determining the relationships among the biological variables with respect to different stations in three locations and three seasons. Proportion of variance in phenotypic traits/ biological variables explained by predictor variable(s) in stepwise sequential tests following AICc (Akaike Information Selection Criterion corrected). GQlty=Gonad Quality, TI=Test or body wall index, GSI=Gonad index, ALI=Aristotle's lantern index, GI=Gut index, RI=Repletion index. Prop. is the proportion of variance explained by each single variable; Cumul. is the cumulative proportion of variance explained by multiple variables; res.df=residual degrees of freedom.

**MARGINAL TESTS: % of variance accounted for each variable**

| Variable | SS(trace) | Pseudo-F | P     | Prop.  |
|----------|-----------|----------|-------|--------|
| TI       | 2133.0    | 75.34    | 0.001 | 0.3669 |
| GSI      | 2065.0    | 71.62    | 0.001 | 0.3552 |
| ALI      | 2206.6    | 79.53    | 0.001 | 0.3796 |
| GI       | 2035.7    | 70.05    | 0.001 | 0.3502 |
| RI       | 1892.3    | 62.73    | 0.001 | 0.3255 |
| GQlty    | 991.6     | 26.74    | 0.001 | 0.1706 |

**SEQUENTIAL TESTS: % of variance accounted for each variable**

| Variable      | AICc      | SS(trace) | Pseudo-F | P            | Prop.         | Cumul. (R <sup>2</sup> ) | res.df |
|---------------|-----------|-----------|----------|--------------|---------------|--------------------------|--------|
| <b>+ALI</b>   | 440.73    | 2206.6    | 79.53    | <b>0.001</b> | <b>0.3796</b> | <b>0.3796</b>            | 130    |
| <b>+RI</b>    | 352.04    | 719.6     | 51.62    | <b>0.001</b> | <b>0.3135</b> | <b>0.6931</b>            | 128    |
| <b>+GI</b>    | 286.84    | 713.2     | 84.57    | <b>0.001</b> | <b>0.2109</b> | <b>0.9039</b>            | 127    |
| <b>+GSI</b>   | -34.897   | 468.11    | 646.44   | <b>0.001</b> | <b>0.0805</b> | <b>0.9844</b>            | 125    |
| <b>+GQlty</b> | -Infinity | 110.04    | -698.87  | <b>1.000</b> | 0.0189        | <b>1.003</b>             | 124    |

Supplemental Table 1 (continued...)

**SEQUENTIAL TESTS: Predictor variables for GONAD INDEX (GSI)**

| Variable | AICc   | SS(trace) | Pseudo-F | P     | Prop.  | Cumul. (R <sup>2</sup> ) | res.df |
|----------|--------|-----------|----------|-------|--------|--------------------------|--------|
| +ALI     | 379.77 | 950.24    | 54.35    | 0.001 | 0.2948 | 0.2948                   | 130    |

**SEQUENTIAL TESTS: Predictor variables for GUT INDEX**

| Variable | AICc   | SS(trace) | Pseudo-F | P     | Prop.  | Cumul. (R <sup>2</sup> ) | res.df |
|----------|--------|-----------|----------|-------|--------|--------------------------|--------|
| +ALI     | 248.11 | 127.16    | 846.24   | 0.001 | 0.8668 | 0.8668                   | 130    |
| +RI      | 254.14 | 1.17      | 8.19     | 0.007 | 0.0079 | 0.8748                   | 129    |

**SEQUENTIAL TESTS: Predictor variables for ARISTOTLE's LANTERN INDEX (ALI)**

| Variable | AICc   | SS(trace) | Pseudo-F | P     | Prop.  | Cumul. (R <sup>2</sup> ) | res.df |
|----------|--------|-----------|----------|-------|--------|--------------------------|--------|
| +GI      | 12.826 | 967.19    | 891.55   | 0.001 | 0.8727 | 0.8727                   | 130    |
| +RI      | 7.2217 | 21.78     | 23.56    | 0.001 | 0.0197 | 0.8924                   | 129    |

**SEQUENTIAL TESTS: Predictor variables for REPLETION INDEX: RI = Gut+content wt.: BW ratio**

| Variable | AICc   | SS(trace) | Pseudo-F | P     | Prop.  | Cumul. (R <sup>2</sup> ) | res.df |
|----------|--------|-----------|----------|-------|--------|--------------------------|--------|
| +ALI     | 410.46 | 1607.30   | 72.86    | 0.001 | 0.3592 | 0.3592                   | 130    |
| +GI      | 402.91 | 202.02    | 9.78     | 0.003 | 0.0451 | 0.4043                   | 129    |

**Percentage of variation explained by individual axes based from DistLM and dbRDA analyses**

| Axis | % explained variation<br>out of fitted model |            | % explained variation<br>out of total variation |            |
|------|----------------------------------------------|------------|-------------------------------------------------|------------|
|      | Individual                                   | Cumulative | Individual                                      | Cumulative |
| 1    | 70.36                                        | 70.36      | 70.57                                           | 70.57      |
| 2    | 12.62                                        | 82.99      | 12.66                                           | 83.23      |
| 3    | 8.42                                         | 91.4       | 8.44                                            | 91.67      |
| 4    | 4.93                                         | 96.34      | 4.95                                            | 96.62      |
| 5    | 2.39                                         | 98.72      | 2.4                                             | 99.01      |
| 6    | 1.05                                         | 99.77      | 1.05                                            | 100.06     |
| 7    | 0.23                                         | 100        | 0.23                                            | 100.29     |

**Supplemental Table 2.** Distance-based linear model (DistLM) examining the percentage of variance accounted for each biological seagrass and environmental variables (diffusion factor (DF), sea surface temperature (SST), mean site depth, seagrass abundance measures such as shoot density (shootden), leaf production (leafprodn), and fresh or dry weight seagrass biomass (FW, DW biomass) in three locations and three seasons. Proportion of variance in biological variables explained by predictor variable(s) in stepwise sequential tests following AICc (Akaike Information Selection Criterion corrected). Prop. is the proportion of variance explained by each single variable; Cumul. is the cumulative proportion of variance explained by multiple variables; res.df=residual degrees of freedom.

#### ENVIRONMENTAL VARIABLES

1. SST
2. DF
3. Depth
4. shoot density
5. leaf production
6. FW biomass
7. DW biomass

#### MARGINAL TESTS

| Variable   | SS(trace) | Pseudo-F | P             | Prop.    |
|------------|-----------|----------|---------------|----------|
| SST        | 905.9     | 24.00    | <b>0.0002</b> | 0.1558   |
| DF         | 1086.1    | 29.87    | <b>0.0002</b> | 0.1868   |
| Depth      | 110.65    | 2.52     | 0.0584        | 0.0190   |
| Shootden   | 1245      | 35.43    | <b>0.0002</b> | 0.2142   |
| LeafProd   | 433.56    | 10.48    | <b>0.0002</b> | 0.0746   |
| FW biomass | 152.27    | 3.50     | <b>0.0200</b> | 2.62E-02 |
| DW biomass | 101.86    | 2.32     | 0.0734        | 1.75E-02 |

#### SEQUENTIAL TESTS

| Variable          | AICc   | SS(trace) | Pseudo-F | P             | Prop.          | Cumul.        | res.df |
|-------------------|--------|-----------|----------|---------------|----------------|---------------|--------|
| <b>+shootden</b>  | 471.92 | 1245.00   | 35.425   | <b>0.0002</b> | <b>0.21415</b> | 0.2142        | 130    |
| <b>+SST</b>       | 464.99 | 302.17    | 9.136    | <b>0.0002</b> | 5.20E-02       | 0.2661        | 129    |
| <b>+leafprodn</b> | 462    | 162.17    | 5.058    | <b>0.0028</b> | 2.79E-02       | 0.2940        | 128    |
| <b>+DF</b>        | 457.9  | 190.20    | 6.172    | <b>0.0004</b> | 3.27E-02       | <b>0.3267</b> | 127    |

Supplemental Table 2 (continued...)

**ENVIRONMENTAL VARIABLES**

1. SST
2. DF
3. Depth
4. shoot density
5. leaf production
6. FW biomass
7. DW biomass

**MARGINAL TESTS**

| Variable   | SS(trace) | Pseudo-F | P             | Prop.    |
|------------|-----------|----------|---------------|----------|
| SST        | 905.9     | 24.00    | <b>0.0002</b> | 0.1558   |
| DF         | 1086.1    | 29.87    | <b>0.0002</b> | 0.1868   |
| Depth      | 110.65    | 2.52     | 0.0584        | 0.0190   |
| Shootden   | 1245      | 35.43    | <b>0.0002</b> | 0.2142   |
| LeafProd   | 433.56    | 10.48    | <b>0.0002</b> | 0.0746   |
| FW biomass | 152.27    | 3.50     | <b>0.0200</b> | 2.62E-02 |
| DW biomass | 101.86    | 2.32     | 0.0734        | 1.75E-02 |

**SEQUENTIAL TESTS**

| Variable          | AICc   | SS(trace) | Pseudo-F | P             | Prop.          | Cumul.        | res.df |
|-------------------|--------|-----------|----------|---------------|----------------|---------------|--------|
| <b>+shootden</b>  | 471.92 | 1245.00   | 35.425   | <b>0.0002</b> | <b>0.21415</b> | 0.2142        | 130    |
| <b>+SST</b>       | 464.99 | 302.17    | 9.136    | <b>0.0002</b> | 5.20E-02       | 0.2661        | 129    |
| <b>+leafprodn</b> | 462    | 162.17    | 5.058    | <b>0.0028</b> | 2.79E-02       | 0.2940        | 128    |
| <b>+DF</b>        | 457.9  | 190.20    | 6.172    | <b>0.0004</b> | 3.27E-02       | <b>0.3267</b> | 127    |

**Supplemental Table 3.** Proximate analysis of macrophyte food for *T. gratilla* and its gonads.

|                                             | Source                     | Protein<br>(g/100g) | Fat<br>(g/100g) | Ash<br>(g/100g) | Moisture<br>(g/100g) | CHO<br>(g/100g) | TOTAL<br>(g/100) | CAL<br>(kCal/100g) |
|---------------------------------------------|----------------------------|---------------------|-----------------|-----------------|----------------------|-----------------|------------------|--------------------|
| <i>Thalassia hemprichii</i> shoots          |                            |                     |                 |                 |                      |                 |                  |                    |
| 1                                           | western stations           | 11.8                | 0.1             | 24.7            | 14.4                 | 49.0            | 100              | 244.1              |
| 2                                           | eastern station Pilar      | 11.7                | 0.5             | 24.5            | 15.3                 | 48.0            | 100              | 243.3              |
| <i>Syringodium isoetifolium</i> *<br>shoots |                            |                     |                 |                 |                      |                 |                  |                    |
| 1                                           | western stations           | 7.4                 | 0.4             | 44.1            | 11.9                 | 36.2            | 100              | 178.0              |
| <i>Sargassum</i> spp. fronds                |                            |                     |                 |                 |                      |                 |                  |                    |
| 1                                           | NEast monsoon season       | 5.6                 | 0.1             | 31.8            | 25.1                 | 37.4            | 100              | 172.9              |
| 2                                           | Summer season              | 4.2                 | 0.1             | 43.2            | 13.2                 | 39.3            | 100              | 174.9              |
| <i>Gracilaria edulis</i> filaments          |                            |                     |                 |                 |                      |                 |                  |                    |
| 1                                           | NEast monsoon/ cold season | 3.9                 | 0.5             | 38.0            | 14.1                 | 43.5            | 100              | 194.1              |
| 2                                           | Summer season              | 5.7                 | 0.4             | 52.8            | 10.0                 | 31.1            | 100              | 150.8              |
| <i>Tripneustes gratilla</i> gonads**        |                            |                     |                 |                 |                      |                 |                  |                    |
| 1                                           | western stations           | 7.7                 | 3.7             | 2.7             | 83.3                 | 2.6             | 100              | 74.5               |
| 2                                           | Eastern stations Victory   | 7.2                 | 4.3             | 2.4             | 82.6                 | 3.5             | 100              | 81.5               |

\* Limited shoots; none in majority of sites;    \*\* samples from the eastern stations Pilar not analyzed by PIPAC (Ateneo de Manila) due to limited volume
