# Supplementary material
Source: MDPI journal article supplement (https://www.mdpi.com/1424-2818/15/7/843)
Supplement: s1 [file s1 › source data_sea urchin parameters_FINAL.xlsx]

## Sheet: Fig 3_Gut content index RI
		Repletion/ Gut content index (Relative consumption rate)
		OVERALL MEAN
		SW monsoon	NE monsoon	Easterly/ Summer
Far stations	Overall Mean	18.64	22.99	14.13
	S.E.	0.85	1.53	1.24
Intermediate stations	Overall Mean		17.93	13.98
	S.E.		0.61	0.86
Near stations	Overall Mean	12.29
	S.E.	0.87

## Sheet: Fig 4_ A lantern index ALI
		Aristotle's lantern index
		OVERALL MEAN
		SW monsoon	NE monsoon	Easterly/ Summer
Far stations	Overall Mean	14.71	13.68	11.22
	S.E.	0.73	0.65	0.47
Intermediate stations	Overall Mean		10.05	9.87
	S.E.		0.71	0.54
Near stations	Overall Mean	8.3
	S.E.	0.46

## Sheet: Fig 5_Gut index GI
		Gut index
		OVERALL MEAN
		SW monsoon	NE monsoon	Easterly/ Summer
Far stations	Overall Mean	5.64	4.63	4.11
	S.E.	0.29	0.21	0.19
Intermediate stations	Overall Mean		3.36	3.8
	S.E.		0.26	0.22
Near stations	Overall Mean	2.86
	S.E.	0.17

## Sheet: Fig 6_Gonad index GSI
		Gonadosomatic index (GSI)
		OVERALL MEAN
		SW monsoon	NE monsoon	Easterly/ Summer
Far stations	Overall Mean	14.6	20.62	18.91
	S.E.	0.64	0.92	1.07
Intermediate stations	Overall Mean		14.04	14.05
	S.E.		1.08	0.97
Near stations	Overall Mean	10.39
	S.E.	1.15

## Sheet: Fig 7__Gonad quality Glty
	OVERALL Gonad Quality (% frequency per category)
	Grade I (worst)	Grade II	Grade III	Grade IV	Grade V (Best)
Far stations	9.6	13.7	47.9	12.3	16.4
Intermediate stations	35	25	35	3.3	1.7
Near stations	77.3	9.1		9.1	4.5

## Sheet: GonadQFFarms effOVERALLseason2
		OVERALL Gonad Quality (modified from Agatsuma et al 2005 according to Munsell color cards)								OVERALL Gonad Quality (modified from Agatsuma et al 2005 according to Munsell color cards)								OVERALL Gonad Quality (modified from Agatsuma et al 2005 according to Munsell color cards)
		Grade I (worst)	Grade II	Grade III	Grade IV	Grade V (Best)				Grade I (worst)	Grade II	Grade III	Grade IV	Grade V (Best)				Grade I (worst)	Grade II	Grade III	Grade IV	Grade V (Best)
	Unimpacted sites	9.58904	13.6986	47.9452	12.3288	16.4384		western stations	SW monsoon	13.3333	26.6667			60		REFERENCE sites (Lucero, Silaqui)	site 1	13.3333	26.6667			60
	Impacted B sites	35	25	35	3.33333	1.66667			NE monsoon	13.3333	16.6667	60	3.33333	6.66667			site 2
	Impacted A sites	77.2727	9.09091		9.09091	4.54545			Easterly/ Summer	3.57143	3.57143	60.7143	28.5714	3.57143			site 3
								eastern stations Victory	NE monsoon	36.6667	30	30		3.33333		INTERMEDIATE/ Near fish farm (Victory, Dewey)	site 1	13.3333	16.6667	60	3.33333	6.66667
									Easterly/ Summer	33.3333	20	40	6.66667				site 2	3.57143	3.57143	60.7143	28.5714	3.57143
								eastern stations Pilar	SW monsoon	77.2727	9.09091		9.09091	4.54545			site 3	36.6667	30	30		3.33333
																POLLUTED/ Nearest fish farm (Pilar, Pislatan)	site 1	33.3333	20	40	6.66667										LIT
																	site 2	77.2727	9.09091		9.09091	4.54545

## Sheet: Fig_Body wall index
		Body wall index
		OVERALL MEAN
		SW monsoon	NE monsoon	Easterly/ Summer
western stations	Overall Mean	30.52	41.15	37.96
	S.E.	1.53	1.18	1.14
eastern stations Victory	Overall Mean		36.21	37.18
	S.E.		1.53	1.05
eastern stations Pilar	Overall Mean	26.63
	S.E.	0.98

## Sheet: Fig_Test thickness
		Test thickness
		OVERALL MEAN (mm)
		SW monsoon	NE monsoon	Easterly/ Summer
western stations	Overall Mean	1.5548	1.3491	1.3681
	S.E.	0.03	0.03	0.02
eastern stations Victory	Overall Mean		1.5499	1.4401
	S.E.		0.03	0.03
eastern stations Pilar	Overall Mean	1.2994
	S.E.	0.03
