# Supplementary material
Source: MDPI journal article supplement (https://www.mdpi.com/1424-2818/15/7/843)
Supplement: s1 [file s1 › source data_seagrass parameters_FINAL.xlsx]

## Sheet: Shoot density
		Overall Mean Shoot Density
		SW monsoon	NE monsoon	Easterly/ Summer
Far stations	Overall Mean	960.67	892.17	1142
	S.E.	49.72	66.27	108.17
Intermediate stations	Overall Mean		950.33	830
	S.E.		82.97	52.66
Near stations	Overall Mean	454
	S.E.	49.72

## Sheet: Leaf production
		Overall Mean Leaf Production (mg DW m-2 day-1)
		SW monsoon	NE monsoon	Easterly/ Summer
Far stations	Overall Mean	3738.39	3171.11	2929.78
	S.E.	53.96	494.54	464.14
Intermediate stations	Overall Mean		3662.12	2934.81
	S.E.		468.89	214.53
Near stations	Overall Mean	2355.23
	S.E.	48.05

## Sheet: Fresh AG biomass
		Overall Mean Above-ground Fresh Biomass
		SW monsoon	NE monsoon	Easterly/ Summer
Far stations	Overall Mean	639.4	626.73	746.3
	S.E.	17.04	47.01	116.4
Intermediate stations	Overall Mean		934.49	975.98
	S.E.		144.88	52.79
Near stations	Overall Mean	607.87
	S.E.	34.76

## Sheet: Dry AG biomass
		Overall Mean Above-ground Dry Biomass
		SW monsoon	NE monsoon	Easterly/ Summer
Far stations	Overall Mean	109.47	97.56	110.31
	S.E.	3.2	4.81	13.6
Intermediate stations	Overall Mean		155.01	138.27
	S.E.		19.84	8.86
Near stations	Overall Mean	107.4
	S.E.	5.49
