# Supplementary material
Source: MDPI journal article supplement (https://www.mdpi.com/1424-2818/15/7/843)
Supplement: s1 [file s1 › Table 1 and 2_editable_Final2.pdf]

---

## Canonical Analysis of Principal Coordinates (CAP)

### Correlations

| Eigenvalue | Correlation   | Correlation sq. ( $\delta^2$ ) |
|------------|---------------|--------------------------------|
| 1          | <b>0.9149</b> | <b>0.8371</b>                  |
| 2          | 0.7861        | 0.618                          |

| m | % Var (1 <sup>st</sup> PCO) | Total Allocation success (%) | 1 <sup>st</sup> Correlation sq. ( $\delta^2$ ) | P value |
|---|-----------------------------|------------------------------|------------------------------------------------|---------|
| 3 | 71.04                       | <b>92.424</b>                | 0.83709                                        | 0.001   |

---

### Cross Validation

(Leave-one-out allocation of observation to groups)

| Original Groups       | Classified   |                       |               | Total | % correct |
|-----------------------|--------------|-----------------------|---------------|-------|-----------|
|                       | FAR stations | INtermediate stations | NEAR stations |       |           |
| FAR stations          | 50           | 0                     | 0             | 50    | 100       |
| INtermediate stations | 10           | 50                    | 0             | 60    | 83.33     |
| NEAR stations         | 0            | 0                     | 22            | 22    | 100       |

---

**CAP Pearson correlatons**

(Response variables: *T. gratilla* and seagrass variables)

|      | GSI    | ALI    | GI     | RI     | GQlty  | Shoot den | Leaf prod | FW<br>biomass | DW<br>biomass |
|------|--------|--------|--------|--------|--------|-----------|-----------|---------------|---------------|
| CAP1 | -0.663 | -0.599 | -0.621 | -0.504 | -0.503 | -0.849    | -0.565    | -0.132        | -0.0152       |
| CAP2 | -0.182 | -0.148 | -0.140 | -0.054 | -0.175 | 0.145     | 0.464     | 0.922         | 0.875         |

---

**CAP Pearson correlation**

(Environmental variables)

|      | SST   | DF     | Depth  |
|------|-------|--------|--------|
| CAP1 | 0.334 | -0.707 | -0.023 |
| CAP2 | 0.079 | -0.082 | 0.322  |

---

**PERMUTATION TEST**

Trace statistic =  $\text{tr}(\mathbf{Q}_m' \mathbf{H} \mathbf{Q}_m)$

First squared canonical correlation =  $(\delta_1^2) = \delta_1^2$

Trace statistic:  $\text{tr}(\mathbf{Q}_m' \mathbf{H} \mathbf{Q}_m)$ : **1.45507**    **P: 0.0002**

**$\delta_1^2$ : 0.83709**    **P: 0.0002**

No. of permutations used: 4999

---
