# Supplementary material
Source: MDPI journal article supplement (https://www.mdpi.com/1424-2818/15/7/843)

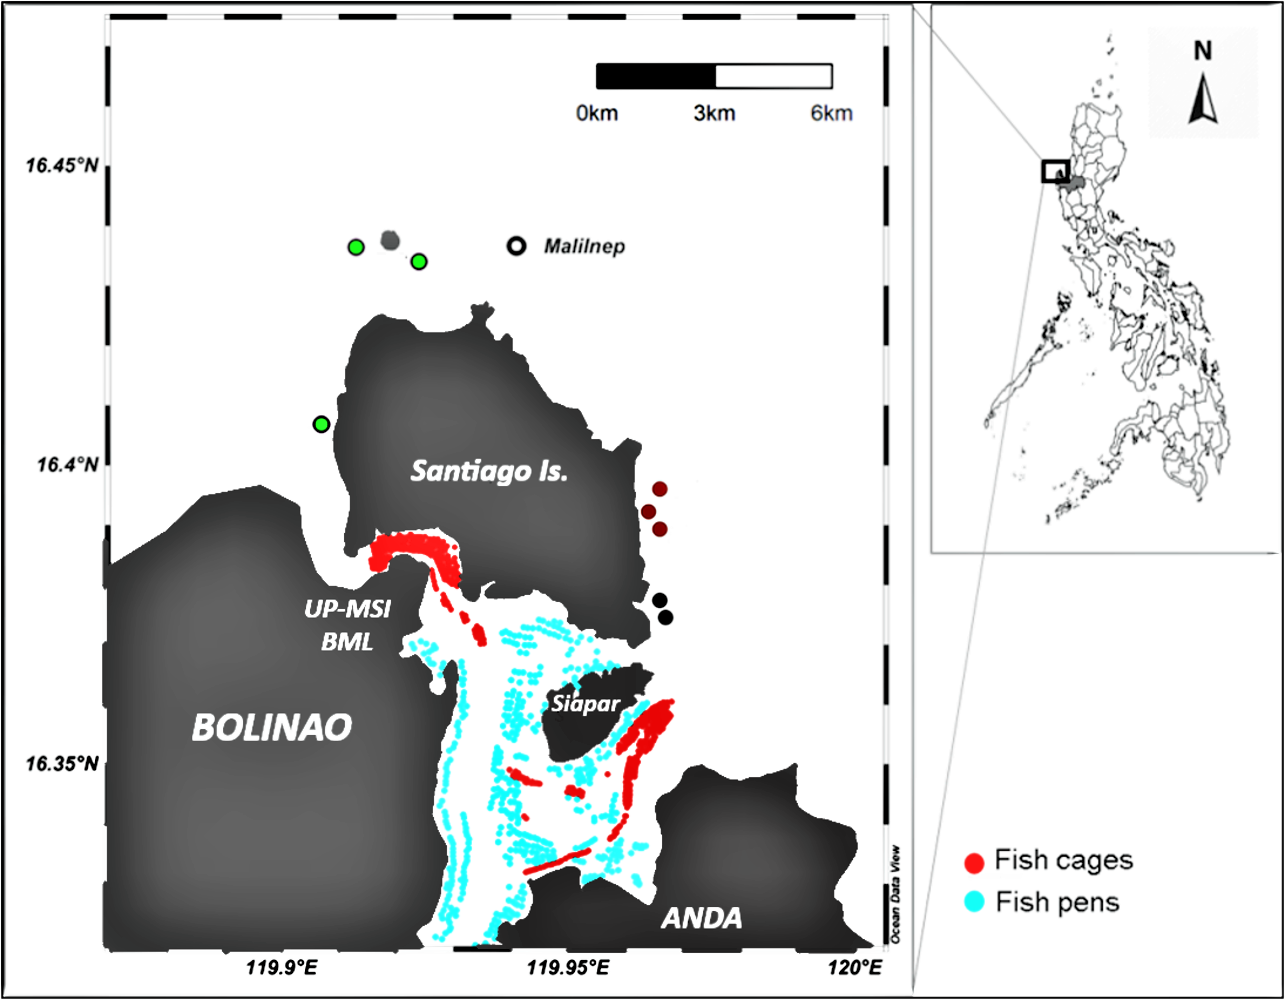

Supplement: s1 [file s1 › FIGURE 1_Final2.tiff]

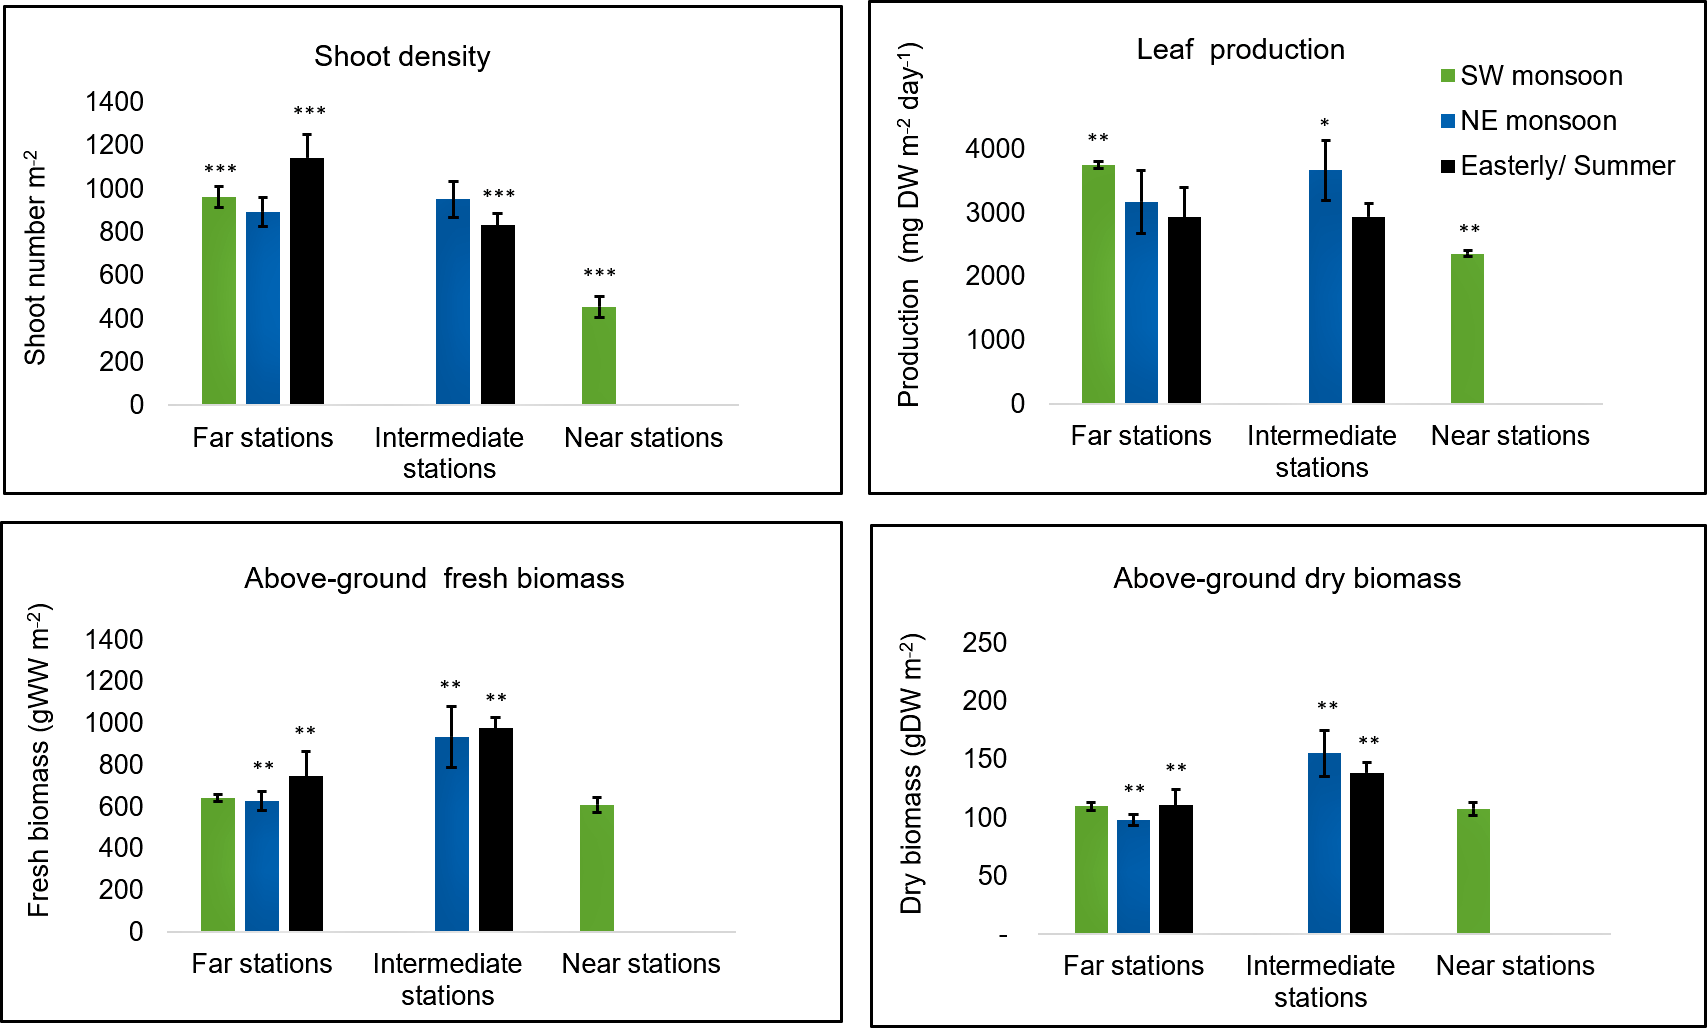

Supplement: s1 [file s1 › FIGURE 2_Final2.tif]

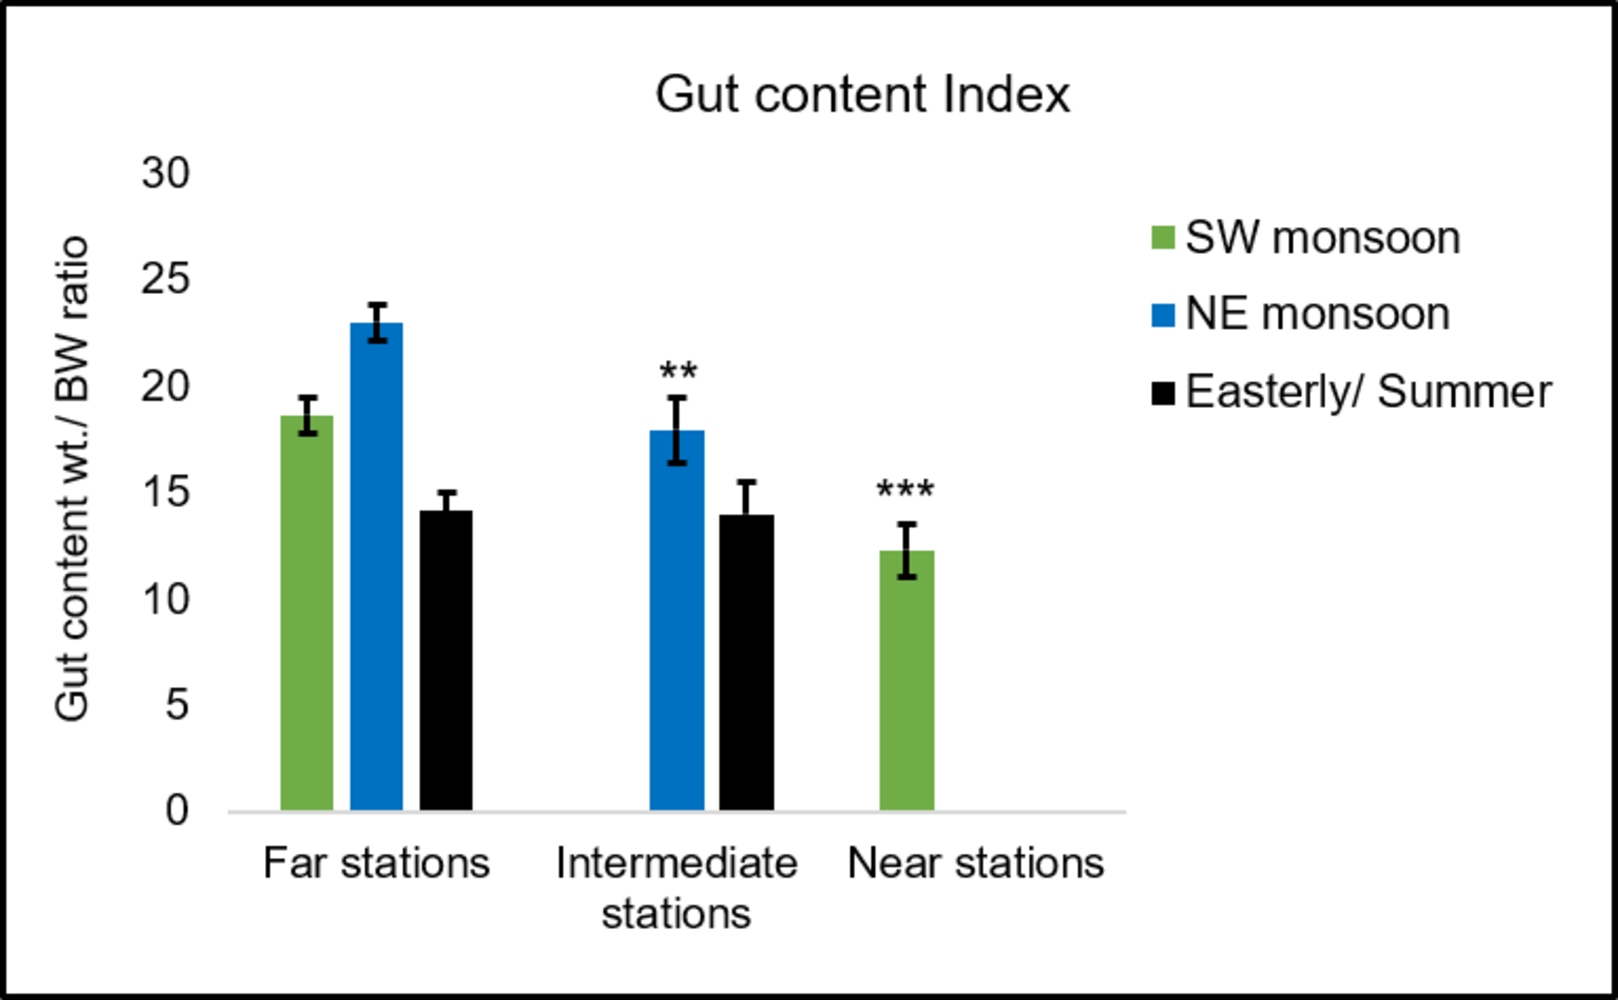

Supplement: s1 [file s1 › FIGURE 3_Final2.tiff]

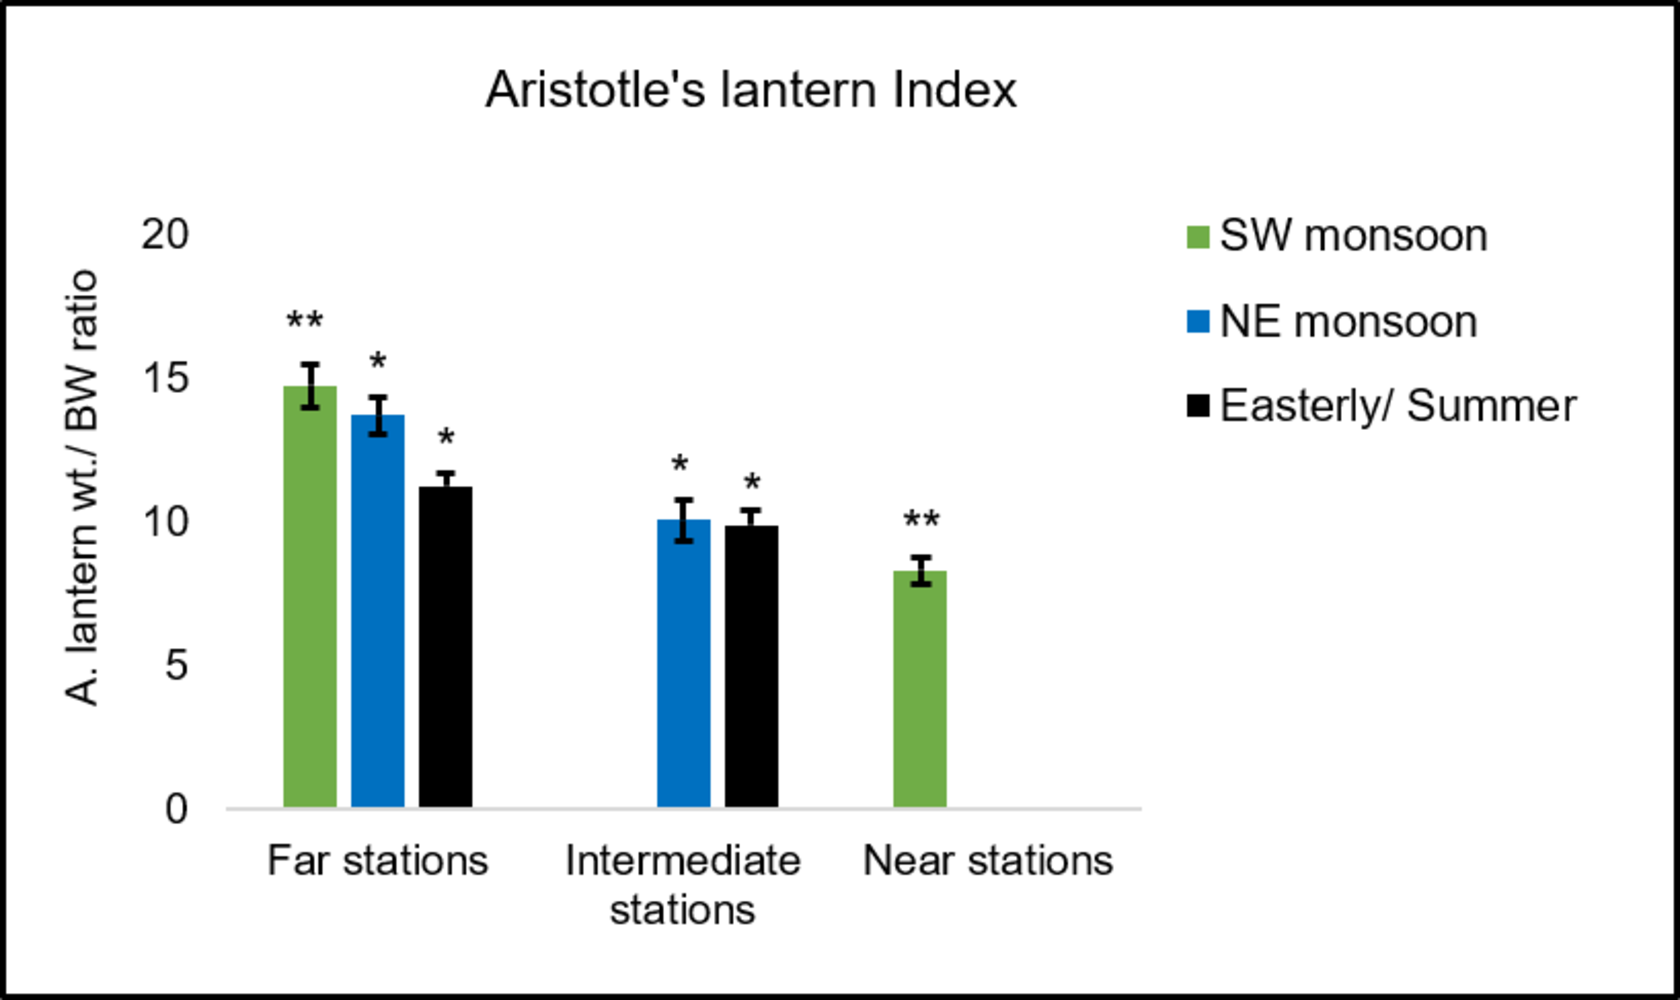

Supplement: s1 [file s1 › FIGURE 4_Final2.tiff]

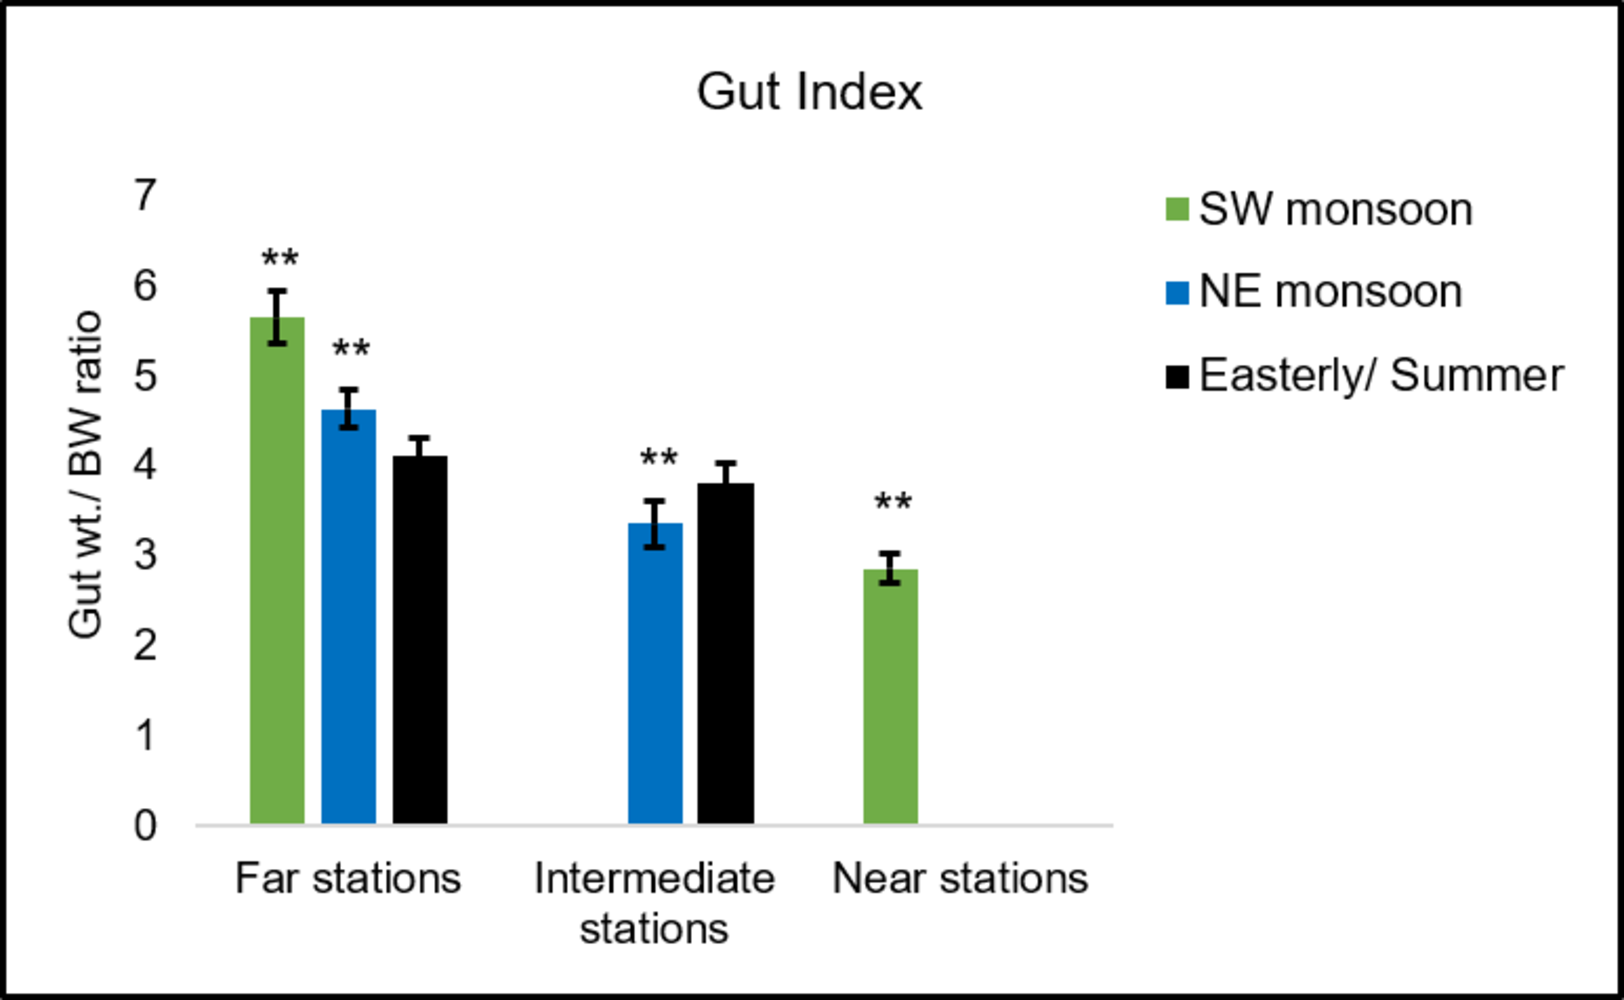

Supplement: s1 [file s1 › FIGURE 5_Final2.tiff]

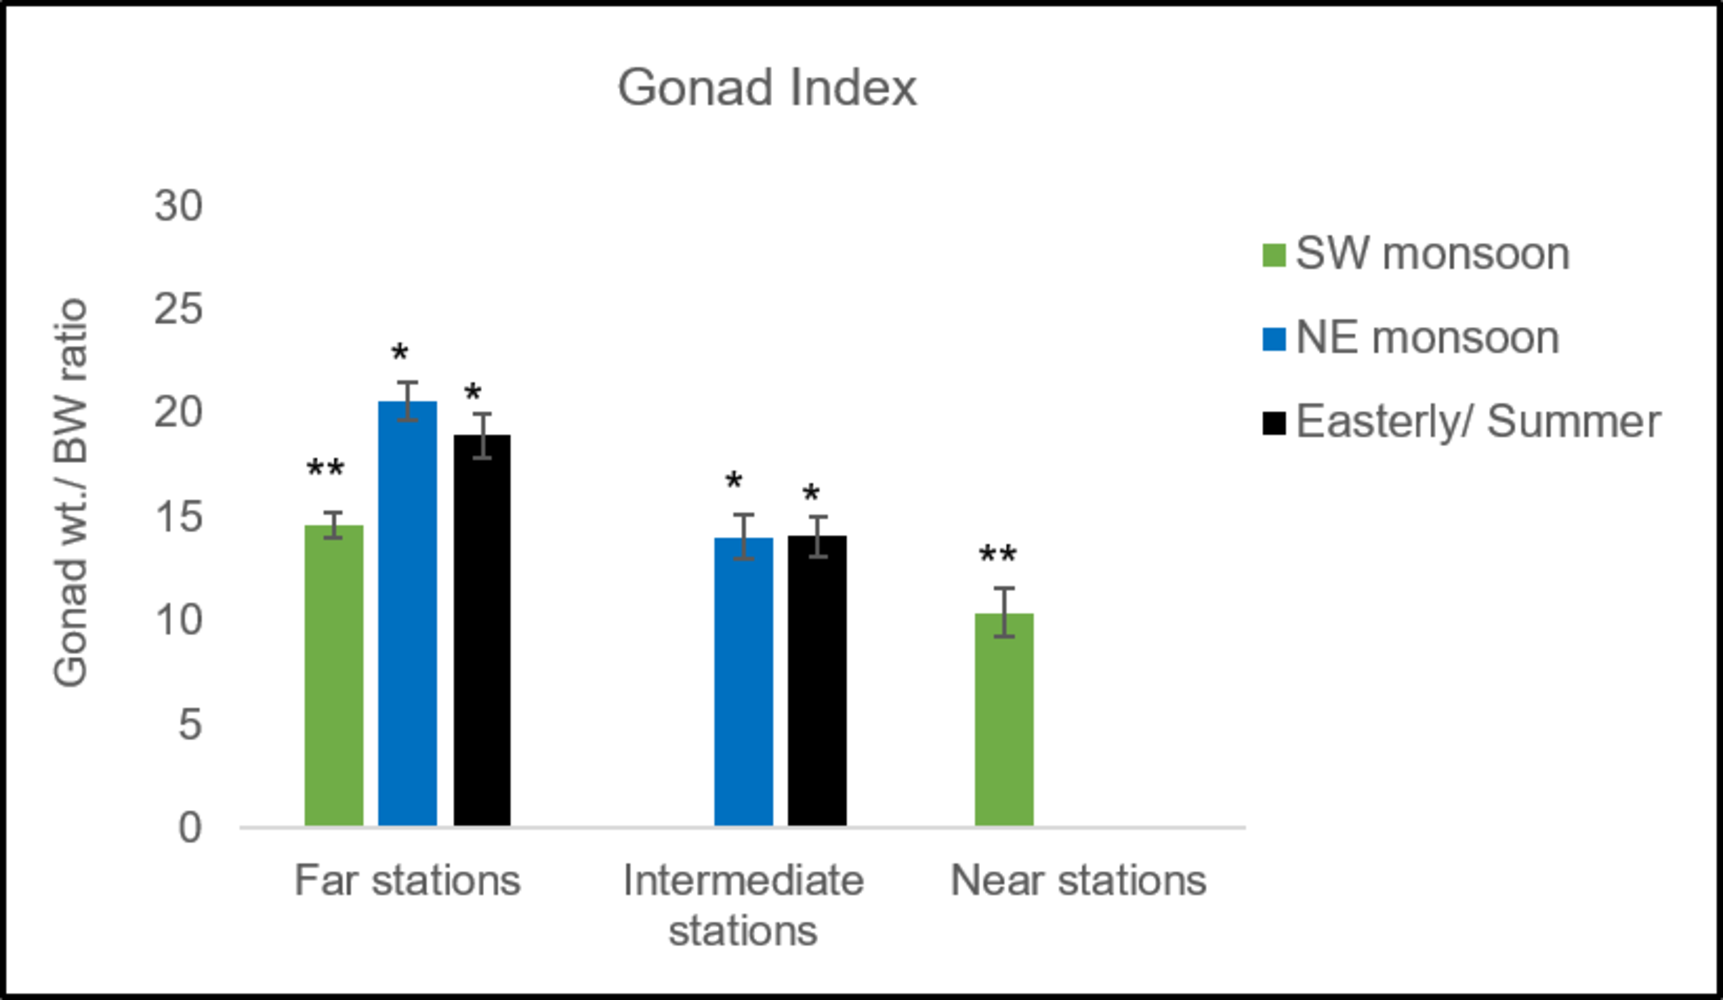

Supplement: s1 [file s1 › FIGURE 6_Final2.tiff]

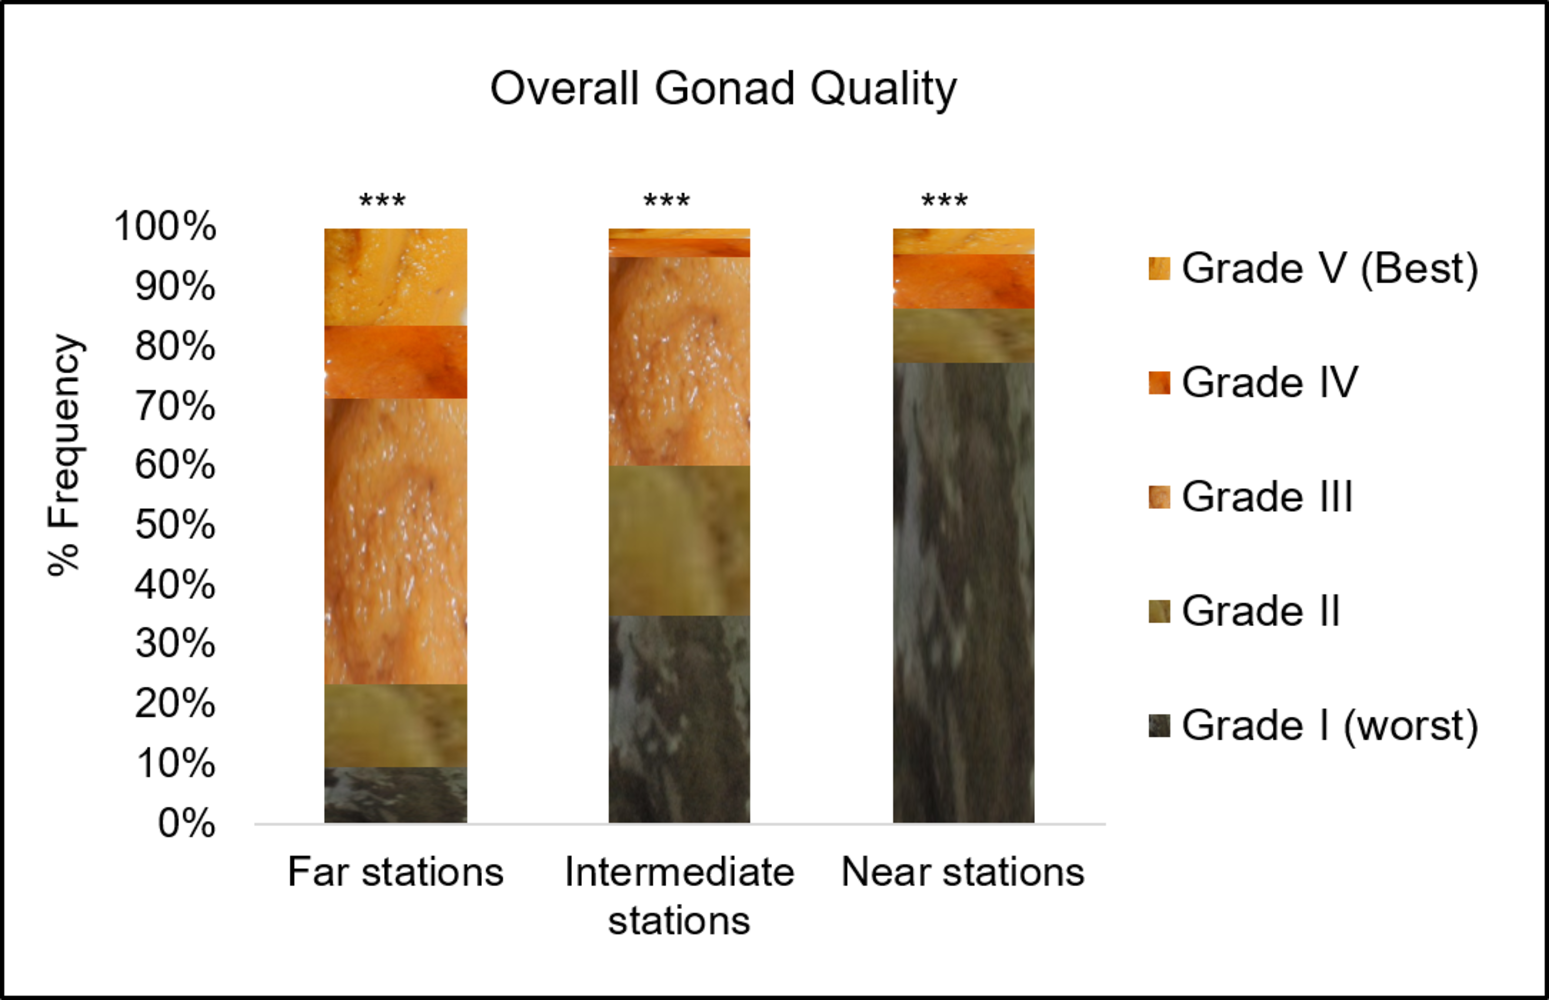

Supplement: s1 [file s1 › FIGURE 7_Final2.tiff]

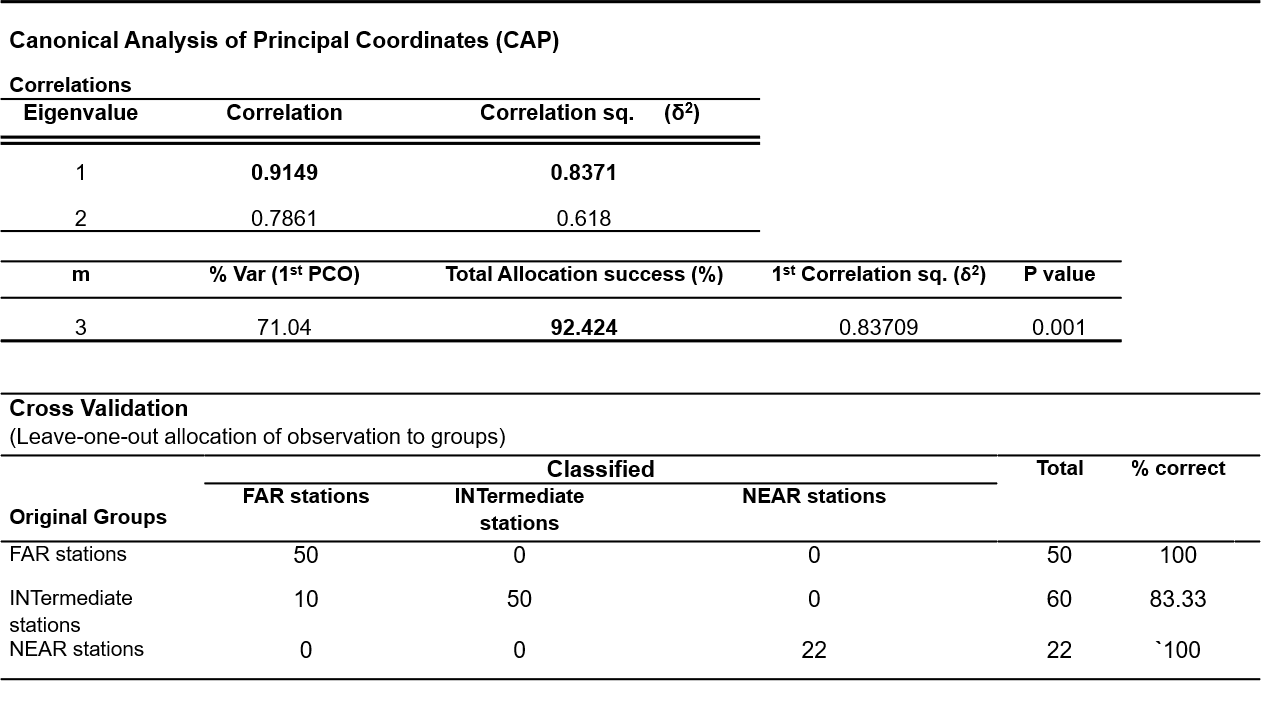

Supplement: s1 [file s1 › Table 1_Final.tif]

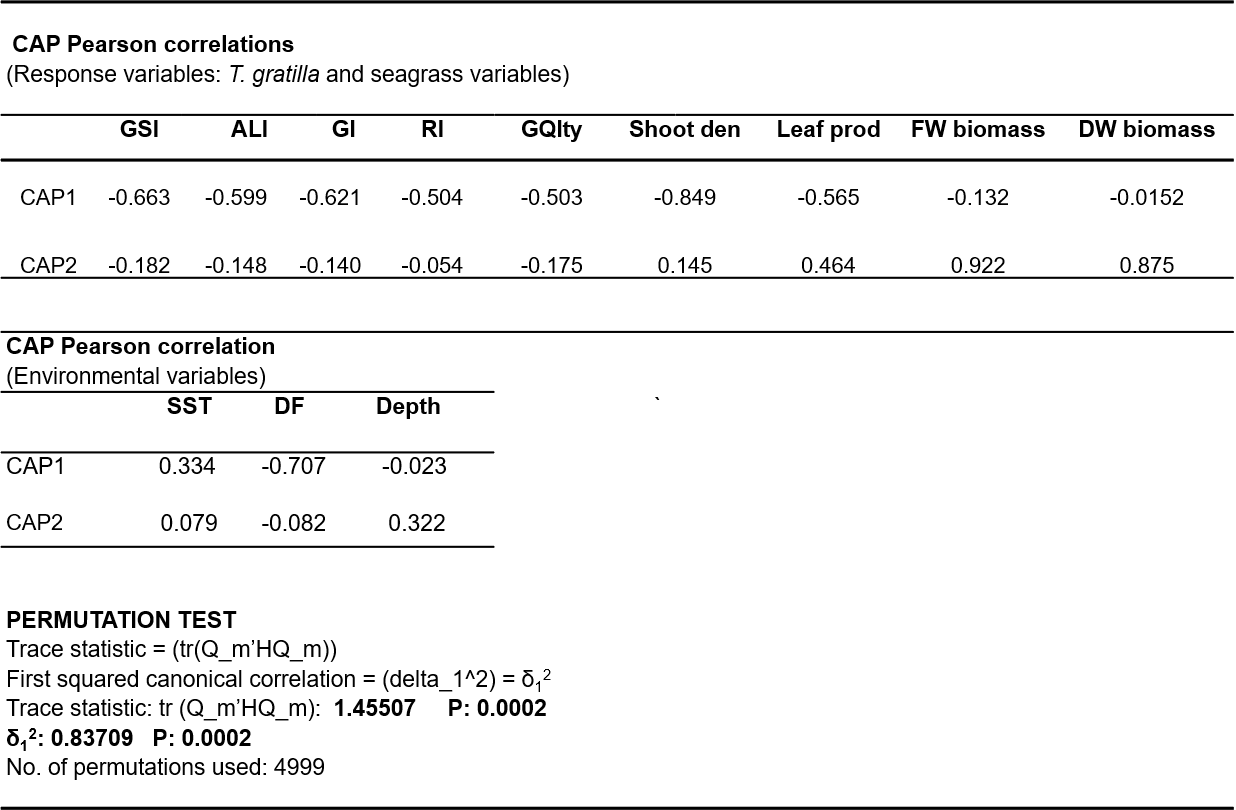

Supplement: s1 [file s1 › Table 2_Final.tif]
